# Supplementary material for: Precise genotyping of circular mobile elements from metagenomic data uncovers human-associated plasmids with recent common ancestors
Source: Genome Res. 2022 May;32(5):986–1003. doi: 10.1101/gr.275894.121 (PMC9104695; doi:10.1101/gr.275894.121)
Supplement: Supplemental Material [file supp_gr.275894.121_SupplementalNotes.docx]

Supplementary Note 1

**Theorem 1**. Let be a non-redundant contig set, let be the assembly graph of , let be a latent circuit *coverage* function, and let be the induced edge *coverage* function of . For any cycle in it holds that .

**Proof.** Let be a cycle and let be a circuit over the contigs that satisfies . We denote by the number of times the circuit crosses into the cycle , or formally . Since every entry of the circuit into the cycle has a matching exit event it holds that . We express as a function of :

Similarly, also equals and therefore:

|  |  | (1) |
| --- | --- | --- |

The set of circuits can be expressed as a disjoint union of (1) the circuits that do not cross into the cycle , (2) the circuits that do not cross out of the cycle , and (3) the circuits that cross into the cycle once or more.

Let , be an edge in the cycle that gets a minimal coverage value. It holds that:

Since and (by definition) we can simplify:

By definition, any circuit enters the cycle precisely times, and traverses the edge up to times on each visit. Therefore, it holds that . We substitute to get the inequality:

Reorganizing the equation, we get:

By assigning equation 1 we get:

Supplementary Note 2

**Proposition:** All cycles returned by Algorithm 1 are dominant.

**Proof.** Assume is added to the result set in line 12 of Algorithm 1. It holds that is a cycle since , i.e., the path is closed. The variable is equal to the weight (line 3) and verified to be equal or smaller than the weight of all edges in (line 6), and therefore by definition . The variable equals the by construction due to line 11. Therefore, it holds that . According to Supplementary Note 1 we know that and thus

Supplementary Note 3

**Proposition:** Algorithm 1 returns all dominant cycles.

**Proof.** Assume is a dominant cyclein the graph. Let satisfy . Let us focus on the two algorithm loop attempts (in line 2) that start from and . Suppose for the sake of contradiction that both runs fail and therefore or are not reported by the algorithm. Therefore, the algorithm leaves the cycle prematurely for both attempts and there exists two edges and such that and . Averaging the two inequalities we get . By the definition of the external coverage, we have , and therefore , in contradiction to the fact that the cycle is dominant. Thus or are reported by Algorithm 1

Supplementary Note 4

We estimate a lower bound on the expected time to coalescence of M1a as follows. We estimate the expected number of generations until coalescence based on the equation , where is the nucleotide diversity (average fraction of sites that differ between pairs of genomes) and is the mutation rate (mutations/bp/generation). We denote by the number of generations per year which allows us to express the time to coalescence in years as .

We estimate as follows: According to the two references we identified for M1, the bacterial hosts of plasmid M1a are *Bacteroides* *xylanisolvens* (M1a) and *Bacteroides* *fragilis* (M1b). We use the mutation accumulation rate of *B. fragilis* in natural conditions that was estimated at 0.9 mutations/genome/year1. Dividing by the size of the *B. fragilis* genome (5.295Mb) we get mutations/bp/year.

We estimate as follows: Using the pairwise nucmer alignments (using show-coords) of the 8 M1a members, we found that pairs are separated on average by 1.75 SNPs. Dividing by the size of M1 (4148bp) we get .

Plugging in the estimates of and , we get years.

Noting that the plasmid in gut #2 is an outlier in terms of the number of differentiating SNPs, we computed the same estimate of years to coalescence without that plasmid. In that case we have only 0.85 SNPs between pairs on average, which results in , and years.

One caveat worth mentioning is that this analysis is typically performed using neutral mutations (such as intra-genic synonymous mutations). Due to the small number of polymorphic sites, we use here all mutations (both in the estimation of and of ).

**REFERENCES**

1. Zhao S, Lieberman TD, Poyet M, et al. Adaptive Evolution within Gut Microbiomes of Healthy People. *Cell Host & Microbe*. 2019;25(5):656-667.e8. doi:10.1016/j.chom.2019.03.007
